# Supplementary material for: Human response to live plague vaccine EV, Almaty region, Kazakhstan, 2014-2015
Source: PubMed Central journal article supplement (PMC6568420; doi:10.1371/journal.pone.0218366), 2019-06-14
Supplement: pone.0218366.s003.pdf [file pone.0218366.s003.pdf]

S1 Table. Fragment of database of study “Human response to live plague vaccine EV, Almaty region, Kazakhstan, 2014-2015

|     | A   | B         | C          | D         | E          | F      | G       | H      | I         | J            | K             | L        | M            | N           | O            | P           |     |
|-----|-----|-----------|------------|-----------|------------|--------|---------|--------|-----------|--------------|---------------|----------|--------------|-------------|--------------|-------------|-----|
| 1   | uid | restfirst | restsecond | restthird | restfourth | agegrp | educgrp | gender | workplace | vaccprevfreq | rodentcontact | vacc2014 | vacc13121110 | restfirst14 | restsecond14 | restthird14 | res |
| 2   | 1   | 0         | 0          | 0         | 0          | 1      | 0       | 1      | 0         | 1            | 2             | 0        | 1            | 1           |              |             |     |
| 3   | 2   | 0         | 0          | 0         | 0          | 1      | 0       | 1      | 1         | 1            | 2             | 0        | 1            | 1           |              |             |     |
| 4   | 3   | 0         | 0          | 0         | 0          | 1      | 0       | 1      | 1         | 1            | 2             | 0        | 1            | 1           |              |             |     |
| 5   | 4   | 0         | 0          | 0         | 0          | 1      | 0       | 1      | 1         | 1            | 0             | 0        | 1            | 0           |              |             |     |
| 6   | 5   | 0         | 1          | 0         | 0          | 1      | 0       | 1      | 1         | 1            | 2             | 0        | 1            | 1           |              |             |     |
| 7   | 6   | 0         | 0          | 0         | 0          | 1      | 0       | 1      | 1         | 1            | 0             | 0        | 1            | 0           |              |             |     |
| 8   | 7   | 0         | 0          | 0         | 0          | 1      | 0       | 1      | 1         | 1            | 2             | 1        | 1            | 1           |              |             |     |
| 9   | 8   | 0         | 0          | 0         | 0          | 0      | 0       | 1      | 1         | 1            | 2             | 1        | 1            | 1           |              |             |     |
| 10  | 9   | 0         | 0          | 0         | 0          | 0      | 0       | 1      | 1         | 1            | 2             | 0        | 1            | 1           |              |             |     |
| 11  | 10  | 0         | 0          | 0         | 0          | 1      | 0       | 1      | 1         | 1            | 2             | 0        | 1            | 1           |              |             |     |
| 12  | 11  | 0         | 0          | 0         | 0          | 0      | 0       | 1      | 1         | 1            | 0             | 0        | 1            | 0           |              |             |     |
| 13  | 12  | 0         | 0          | 0         | 0          | 1      | 0       | 1      | 1         | 1            | 2             | 1        | 1            | 1           |              |             |     |
| 14  | 13  | 0         | 0          | 0         | 0          | 0      | 0       | 1      | 1         | 1            | 2             | 0        | 1            | 1           |              |             |     |
| 15  | 14  | 0         | 1          | 0         | 0          | 0      | 0       | 1      | 1         | 1            | 2             | 1        | 1            | 1           |              |             |     |
| 16  | 15  | 0         | 0          | 0         | 0          | 0      | 0       | 1      | 0         | 1            | 2             | 1        | 1            | 1           |              |             |     |
| 17  | 16  | 0         | 0          | 0         | 0          | 0      | 0       | 1      | 0         | 1            | 2             | 1        | 1            | 1           |              |             |     |
| 18  | 17  | 0         | 0          | 0         | 0          | 0      | 0       | 1      | 0         | 1            | 1             | 1        | 1            | 1           |              |             |     |
| 19  | 18  | 0         | 0          | 0         | 0          | 0      | 0       | 0      | 0         | 1            | 2             | 1        | 1            | 1           |              |             |     |
| 20  | 19  | 0         | 0          | 0         | 0          | 0      | 0       | 0      | 0         | 1            | 2             | 1        | 1            | 1           |              |             |     |
| 21  | 20  | 0         | 0          | 0         | 0          | 1      | 0       | 0      | 1         | 1            | 2             | 1        | 1            | 1           |              |             |     |
| 22  | 21  | 0         | 0          | 1         | 1          | 1      | 1       | 0      | 1         | 1            | 2             | 1        | 1            | 1           |              |             |     |
| 23  | 22  | 0         | 0          | 0         | 0          | 1      | 1       | 1      | 1         | 1            | 2             | 1        | 1            | 1           |              |             |     |
| 24  | 23  | 0         | 0          | 0         | 0          | 0      | 0       | 1      | 0         | 1            | 1             | 1        | 1            | 1           |              |             |     |
| 25  | 24  | 1         | 1          | 1         | 1          | 1      | 1       | 0      | 1         | 1            | 2             | 0        | 1            | 1           |              |             |     |
| 26  | 25  | 0         | 0          | 0         | 0          | 1      | 0       | 1      | 1         | 1            | 2             | 1        | 1            | 1           |              |             |     |
| 27  | 26  | 0         | 1          | 0         | 0          | 0      | 1       | 1      | 1         | 1            | 2             | 1        | 1            | 1           |              |             |     |
| 28  | 27  | 0         | 0          | 0         | 0          | 0      | 1       | 1      | 1         | 1            | 1             | 1        | 1            | 1           |              |             |     |
| 29  | 28  | 0         | 0          | 0         | 0          | 0      | 0       | 1      | 1         | 1            | 1             | 1        | 1            | 1           |              |             |     |
| 30  | 29  | 0         | 1          | 0         | 0          | 0      | 1       | 1      | 1         | 1            | 1             | 1        | 1            | 1           |              |             |     |
| 31  | 30  | 0         | 0          | 0         | 0          | 1      | 0       | 0      | 1         | 1            | 2             | 1        | 1            | 1           |              |             |     |
| 32  | 31  | 0         | 0          | 0         | 0          | 1      | 0       | 0      | 1         | 1            | 2             | 1        | 1            | 1           |              |             |     |
| 33  | 32  | 0         | 0          | 0         | 0          | 0      | 0       | 0      | 1         | 1            | 2             | 1        | 1            | 1           |              |             |     |
| 34  | 33  | 0         | 1          | 1         | 1          | 1      | 0       | 0      | 1         | 1            | 2             | 0        | 1            | 1           |              |             |     |
| 35  | 34  | 0         | 0          | 0         | 0          | 1      | 1       | 0      | 1         | 1            | 2             | 0        | 1            | 1           |              |             |     |
| 36  | 35  | 0         | 1          | 1         | 1          | 1      | 0       | 0      | 1         | 1            | 2             | 0        | 1            | 1           |              |             |     |
| 37  | 36  | 0         | 1          | 0         | 0          | 1      | 0       | 0      | 1         | 1            | 2             | 1        | 1            | 1           |              |             |     |
| 38  | 37  | 0         | 1          | 1         | 1          | 0      | 0       | 0      | 1         | 1            | 2             | 0        | 1            | 1           |              |             |     |
| 39  | 38  | 0         | 0          | 0         | 0          | 0      | 0       | 0      | 1         | 1            | 1             | 1        | 1            | 1           |              |             |     |
| 40  | 39  | 0         | 0          | 0         | 0          | 1      | 0       | 0      | 1         | 1            | 2             | 1        | 1            | 1           |              |             |     |
| 41  | 40  | 0         | 0          | 1         | 0          | 0      | 1       | 1      | 1         | 1            | 2             | 1        | 1            | 1           |              |             |     |
| 42  | 41  | 0         | 0          | 0         | 0          | 0      | 1       | 1      | 1         | 1            | 1             | 0        | 1            | 1           |              |             |     |
| 43  | 42  | 0         | 0          | 0         | 0          | 0      | 1       | 1      | 1         | 1            | 1             | 0        | 1            | 1           |              |             |     |
| 44  | 43  | 0         | 1          | 0         | 0          | 0      | 0       | 1      | 0         | 1            | 2             | 0        | 1            | 1           |              |             |     |
| 45  | 44  | 0         | 0          | 0         | 0          | 0      | 0       | 0      | 1         | 1            | 0             | 0        | 1            | 0           |              |             |     |
| 46  | 45  | 0         | 1          | 0         | 0          | 1      | 1       | 0      | 1         | 1            | 1             | 0        | 1            | 0           |              |             |     |
| 47  | 46  | 0         | 0          | 0         | 0          | 0      | 0       | 0      | 1         | 1            | 2             | 0        | 1            | 1           |              |             |     |
| 48  | 47  | 0         | 0          | 0         | 0          | 1      | 0       | 0      | 1         | 1            | 1             | 0        | 1            | 1           |              |             |     |
| 49  | 48  | 0         | 1          | 0         | 0          | 0      | 0       | 0      | 1         | 1            | 2             | 0        | 1            | 1           |              |             |     |
| 50  | 49  | 0         | 1          | 1         | 0          | 1      | 0       | 0      | 1         | 1            | 2             | 0        | 1            | 1           |              |             |     |
| 51  | 50  | 0         | 1          | 1         | 0          | 1      | 0       | 1      | 1         | 1            | 2             | 0        | 1            | 1           |              |             |     |
| 52  | 51  | 0         | 0          | 0         | 0          | 1      | 0       | 0      | 1         | 1            | 1             | 0        | 1            | 1           |              |             |     |
| 53  | 52  | 0         | 1          | 0         | 0          | 1      | 0       | 0      | 1         | 1            | 1             | 0        | 1            | 1           |              |             |     |
| 54  | 53  | 0         | 1          | 0         | 0          | 1      | 1       | 0      | 1         | 1            | 2             | 1        | 1            | 1           |              |             |     |
| 55  | 54  | 0         | 1          | 0         | 0          | 1      | 1       | 1      | 1         | 1            | 2             | 1        | 1            | 1           |              |             |     |
| 56  | 55  | 0         | 0          | 0         | 0          | 1      | 1       | 1      | 1         | 1            | 2             | 1        | 1            | 1           |              |             |     |
| 57  | 56  | 0         | 0          | 0         | 0          | 1      | 0       | 1      | 1         | 1            | 1             | 1        | 1            | 1           |              |             |     |
| 58  | 57  | 0         | 1          | 0         | 0          | 0      | 0       | 1      | 1         | 1            | 2             | 1        | 1            | 1           |              |             |     |
| 59  | 58  | 0         | 0          | 0         | 0          | 0      | 0       | 1      | 1         | 1            | 0             | 0        | 1            | 0           |              |             |     |
| 60  | 59  | 0         | 1          | 1         | 0          | 1      | 0       | 1      | 1         | 1            | 2             | 0        | 1            | 1           |              |             |     |
| 61  | 60  | 0         | 0          | 0         | 0          | 0      | 1       | 1      | 1         | 1            | 1             | 0        | 1            | 1           |              |             |     |
| 62  | 61  | 0         | 0          | 0         | 0          | 1      | 0       | 1      | 1         | 1            | 2             | 1        | 1            | 1           |              |             |     |
| 63  | 62  | 0         | 0          | 0         | 0          | 0      | 0       | 1      | 1         | 1            | 1             | 0        | 1            | 1           |              |             |     |
| 64  | 63  | 0         | 1          | 0         | 0          | 0      | 0       | 1      | 1         | 1            | 0             | 0        | 1            | 0           |              |             |     |
| 65  | 64  | 0         | 0          | 0         | 0          | 0      | 1       | 1      | 1         | 1            | 1             | 0        | 1            | 0           |              |             |     |
| 66  | 65  | 0         | 0          | 0         | 0          | 0      | 1       | 1      | 1         | 1            | 0             | 0        | 1            | 0           |              |             |     |
| 67  | 66  | 0         | 0          | 0         | 0          | 0      | 1       | 1      | 1         | 1            | 1             | 0        | 1            | 1           |              |             |     |
| 68  | 67  | 0         | 1          | 0         | 0          | 0      | 0       | 1      | 1         | 1            | 1             | 0        | 1            | 1           |              |             |     |
| 69  | 68  | 0         | 0          | 1         | 1          | 0      | 1       | 1      | 1         | 1            | 1             | 0        | 1            | 1           |              |             |     |
| 70  | 69  | 0         | 0          | 0         | 0          | 1      | 0       | 1      | 1         | 1            | 2             | 0        | 1            | 1           |              |             |     |
| 71  | 70  | 0         | 0          | 0         | 0          | 1      | 0       | 1      | 1         | 1            | 2             | 1        | 1            | 1           |              |             |     |
| 72  | 71  | 0         | 1          | 0         | 0          | 0      | 0       | 1      | 1         | 1            | 1             | 0        | 1            | 1           |              |             |     |
| 73  | 72  | 0         | 0          | 0         | 0          | 1      | 0       | 1      | 1         | 1            | 2             | 0        | 1            | 1           |              |             |     |
| 74  | 73  | 0         | 1          | 0         | 0          | 0      | 0       | 1      | 1         | 1            | 1             | 0        | 1            | 1           |              |             |     |
| 75  | 74  | 0         | 0          | 0         | 0          | 1      | 0       | 1      | 1         | 1            | 2             | 0        | 1            | 1           |              |             |     |
| 76  | 75  | 0         | 1          | 0         | 0          | 1      | 0       | 1      | 1         | 1            | 2             | 0        | 1            | 1           |              |             |     |
| 77  | 76  | 0         | 0          | 0         | 0          | 0      | 0       | 1      | 1         | 1            | 2             | 0        | 1            | 1           |              |             |     |
| 78  | 77  | 0         | 1          | 0         | 0          | 0      | 0       | 1      | 1         | 1            | 1             | 0        | 1            | 1           |              |             |     |
| 79  | 78  | 0         | 0          | 0         | 0          | 0      | 1       | 1      | 1         | 1            | 1             | 0        | 1            | 1           |              |             |     |
| 80  | 79  | 0         | 0          | 0         | 0          | 0      | 1       | 1      | 1         | 1            | 0             | 0        | 1            | 0           |              |             |     |
| 81  | 80  | 0         | 0          | 0         | 0          | 1      | 0       | 1      | 1         | 1            | 2             | 0        | 1            | 1           |              |             |     |
| 82  | 81  | 0         | 1          | 0         | 0          | 0      | 1       | 1      | 1         | 1            | 1             | 0        | 1            | 1           |              |             |     |
| 83  | 82  | 0         | 1          | 0         | 0          | 0      | 0       | 1      | 1         | 1            | 2             | 0        | 1            | 1           |              |             |     |
| 84  | 83  | 0         | 1          | 1         | 0          | 0      | 0       | 1      | 1         | 1            | 1             | 0        | 1            | 1           |              |             |     |
| 85  | 84  | 0         | 0          | 0         | 0          | 0      | 0       | 1      | 1         | 1            | 1             | 0        | 1            | 1           |              |             |     |
| 86  | 85  | 0         | 0          | 0         | 0          | 1      | 0       | 1      | 1         | 1            | 1             | 0        | 1            | 1           |              |             |     |
| 87  | 86  | 0         | 1          | 1         | 0          | 1      | 0       | 1      | 1         | 1            | 2             | 0        | 1            | 1           |              |             |     |
| 88  | 87  | 0         | 0          | 0         | 0          | 1      | 0       | 1      | 1         | 1            | 2             | 0        | 1            | 1           |              |             |     |
| 89  | 88  | 0         | 0          | 0         | 0          | 0      | 0       | 0      | 1         | 1            | 1             | 0        | 1            | 1           |              |             |     |
| 90  | 89  | 0         | 0          | 0         | 0          | 1      | 0       | 0      | 1         | 1            | 2             | 0        | 1            | 1           |              |             |     |
| 91  | 90  | 0         | 0          | 0         | 0          | 0      | 1       | 1      | 1         | 1            | 2             | 0        | 1            | 1           |              |             |     |
| 92  | 91  | 0         | 0          | 0         | 0          | 0      | 0       | 0      | 1         | 1            | 2             | 1        | 1            | 1           |              |             |     |
| 93  | 92  | 0         | 0          | 0         | 0          | 0      | 0       | 1      | 1         | 1            | 1             | 0        | 1            | 1           |              |             |     |
| 94  | 93  | 0         | 0          | 0         | 0          | 0      | 0       | 1      | 1         | 1            | 2             | 0        | 1            | 1           |              |             |     |
| 95  | 94  | 0         | 0          | 0         | 0          | 1      | 0       | 0      | 1         | 1            | 2             | 0        | 1            | 1           |              |             |     |
| 96  | 95  | 0         | 0          | 0         | 0          | 0      | 0       | 1      | 1         | 1            | 2             | 1        | 1            | 1           |              |             |     |
| 97  | 96  | 0         | 1          | 1         | 0          | 0      | 0       | 1      | 1         | 1            | 2             | 0        | 1            | 1           |              |             |     |
| 98  | 97  | 1         | 1          | 1         | 1          | 0      | 0       | 0      | 1         | 1            | 2             | 1        | 1            | 1           |              |             |     |
| 99  | 98  | 0         | 0          | 0         | 0          | 0      | 0       | 1      | 1         | 1            | 2             | 0        | 1            | 1           |              |             |     |
| 100 | 99  | 0         | 0          | 0         | 0          | 1      | 0       | 1      | 1         | 1            | 2             | 0        | 1            | 1           |              |             |     |
| 101 | 100 | 0         | 0          | 0         | 0          | 1      | 0       | 1      | 1         | 1            | 2             | 0        | 1            | 1           |              |             |     |
| 102 | 101 | 0         | 1          | 1         | 0          | 1      | 0       | 1      | 1         | 1            | 2             | 0        | 1            | 1           |              |             |     |
| 103 | 102 | 0         | 0          | 0         | 0          | 1      | 1       | 1      | 1         | 1            | 2             | 1        | 1            | 1           |              |             |     |
| 104 | 103 | 0         | 0          | 0         | 0          | 1      | 1       | 1      | 1         | 1            | 2             | 0        | 1            | 1           |              |             |     |
| 105 | 104 | 0         | 0          | 0         | 0          | 1      | 0       | 0      | 1         | 1            | 1             | 0        | 1            | 1           |              |             |     |
| 106 | 105 | 0         | 1          | 0         | 0          | 1      | 1       | 1      | 1         | 1            | 2             | 1        | 1            | 1           |              |             |     |
| 107 | 106 | 0         | 1          | 0         | 0          | 1      | 1       | 1      | 1         | 1            | 2             | 1        | 1            | 1           |              |             |     |
| 108 | 107 | 0         | 1          | 0         | 0          | 0      | 0       | 1      | 1         | 1            | 1             | 0        | 1            | 1           |              |             |     |
| 109 | 108 | 0         | 1          | 0         | 0          | 0      | 1       | 0      | 1         | 1            | 2             | 0        | 1            | 1           |              |             |     |
| 110 | 109 | 0         | 1          | 1         | 1          | 1      | 0       | 0      | 1         | 1            | 2             | 1        | 1            | 1           |              |             |     |

|     |     |   |   |   |   |   |   |   |   |   |   |   |   |   |   |   |   |  |  |
|-----|-----|---|---|---|---|---|---|---|---|---|---|---|---|---|---|---|---|--|--|
| 111 | 110 | 0 | 0 | 0 | 0 | 0 | 1 | 0 | 1 | 2 | 1 | 1 |   |   |   |   |   |  |  |
| 112 | 111 | 0 | 1 | 0 | 0 | 1 | 1 | 0 | 1 | 2 | 1 | 1 |   |   |   |   |   |  |  |
| 113 | 112 | 0 | 1 | 1 | 1 | 1 | 1 | 0 | 1 | 2 | 1 | 1 |   |   |   |   |   |  |  |
| 114 | 113 | 0 | 0 |   |   | 1 | 1 | 1 | 1 | 2 | 1 | 1 |   |   |   |   |   |  |  |
| 115 | 114 | 0 | 0 | 0 | 0 | 1 | 0 | 0 | 1 | 2 | 1 | 1 |   |   |   |   |   |  |  |
| 116 | 115 | 0 | 0 |   |   | 1 | 0 | 0 | 1 | 2 | 1 | 1 |   |   |   |   |   |  |  |
| 117 | 116 | 0 | 0 |   |   | 1 | 0 | 0 | 1 | 2 | 1 | 1 |   |   |   |   |   |  |  |
| 118 | 117 | 0 | 0 |   |   | 0 | 0 | 0 | 1 | 0 | 0 | 1 | 0 | 0 | 1 | 0 | 0 |  |  |
| 119 | 118 | 0 | 0 |   |   | 1 | 0 | 0 | 1 | 2 | 1 | 1 |   |   |   |   |   |  |  |
| 120 | 119 | 0 | 0 |   |   | 1 | 0 | 1 | 1 | 1 | 1 | 1 |   |   |   |   |   |  |  |
| 121 | 120 | 0 | 0 |   |   | 1 | 0 | 1 | 1 | 0 | 0 | 1 | 1 | 0 | 1 | 0 | 0 |  |  |
| 122 | 121 | 0 | 0 |   |   | 1 | 1 | 1 | 1 | 2 | 1 | 1 |   |   |   |   |   |  |  |
| 123 | 122 | 0 | 0 |   |   | 1 | 0 | 1 | 1 | 2 | 1 | 1 |   |   |   |   |   |  |  |
| 124 | 123 | 0 | 0 |   |   | 1 | 1 | 1 | 1 | 2 | 1 | 1 |   |   |   |   |   |  |  |
| 125 | 124 | 0 | 0 |   |   | 1 | 0 | 1 | 1 | 2 | 1 | 1 |   |   |   |   |   |  |  |
| 126 | 125 | 0 | 0 |   |   | 1 | 0 | 1 | 1 | 2 | 0 | 1 | 1 | 0 | 1 | 0 | 0 |  |  |
| 127 | 126 | 0 |   |   |   | 1 | 1 | 1 | 1 | 2 | 0 | 1 | 1 |   |   |   |   |  |  |
| 128 | 127 | 0 |   |   |   | 0 | 0 | 1 | 1 | 1 | 1 | 1 |   |   |   |   |   |  |  |
| 129 | 128 | 0 |   |   |   | 1 | 0 | 1 | 1 | 1 | 0 | 1 |   |   |   |   |   |  |  |
| 130 | 129 | 0 | 1 | 1 | 1 | 1 | 0 | 1 | 1 | 2 | 1 | 1 |   |   |   |   |   |  |  |
| 131 | 130 | 0 | 0 | 0 | 0 | 0 | 1 | 1 | 1 | 1 | 0 | 1 |   |   |   |   |   |  |  |
| 132 | 131 | 0 | 1 | 0 | 0 | 0 | 1 | 1 | 1 | 2 | 1 | 1 |   |   |   |   |   |  |  |
| 133 | 132 | 0 | 1 | 0 | 0 | 0 | 1 | 0 | 1 | 0 | 1 | 1 |   |   |   |   |   |  |  |
| 134 | 133 | 0 | 1 | 0 | 1 | 0 | 0 | 0 | 1 | 2 | 1 | 1 |   |   |   |   |   |  |  |
| 135 | 134 | 0 | 1 | 0 | 0 | 0 | 1 | 0 | 1 | 2 | 1 | 0 |   |   |   |   |   |  |  |
| 136 | 135 | 0 | 1 | 0 | 0 | 0 | 0 | 1 | 1 | 1 | 1 | 1 |   |   |   |   |   |  |  |
| 137 | 136 | 0 | 0 | 0 | 0 | 1 | 1 | 1 | 1 | 2 | 1 | 1 |   |   |   |   |   |  |  |
| 138 | 137 | 0 | 1 | 0 | 0 | 1 | 1 | 1 | 1 | 2 | 1 | 1 |   |   |   |   |   |  |  |
| 139 | 138 | 0 | 0 | 0 | 0 | 1 | 0 | 0 | 0 | 1 | 0 | 1 |   |   |   |   |   |  |  |
| 140 | 139 | 0 | 0 | 0 | 0 | 1 | 0 | 0 | 0 | 2 | 1 | 1 |   |   |   |   |   |  |  |
| 141 | 140 | 0 | 0 | 0 | 0 | 1 | 0 | 0 | 0 | 2 | 0 | 1 |   |   |   |   |   |  |  |
| 142 | 141 | 0 | 0 | 0 | 0 | 1 | 0 | 0 | 0 | 2 | 0 | 1 |   |   |   |   |   |  |  |
| 143 | 142 | 0 | 0 | 0 | 0 | 1 | 0 | 0 | 0 | 2 | 0 | 1 |   |   |   |   |   |  |  |
| 144 | 143 | 0 | 0 | 0 | 0 | 1 | 0 | 0 | 0 | 2 | 0 | 1 |   |   |   |   |   |  |  |
| 145 | 144 | 0 | 0 | 0 | 0 | 1 | 0 | 0 | 0 | 2 | 0 | 1 |   |   |   |   |   |  |  |
| 146 | 145 | 0 | 0 | 0 | 0 | 0 | 0 | 0 | 0 | 0 | 0 | 1 | 0 | 0 | 0 | 0 | 0 |  |  |
| 147 | 146 | 0 | 0 | 0 | 0 | 0 | 0 | 0 | 0 | 1 | 0 | 1 |   |   |   |   |   |  |  |
| 148 | 147 | 0 | 0 | 0 | 0 | 0 | 0 | 0 | 0 | 1 | 0 | 1 |   |   |   |   |   |  |  |
| 149 | 148 | 0 | 0 | 1 | 1 | 1 | 0 | 0 | 0 | 1 | 0 | 1 |   |   |   |   |   |  |  |
| 150 | 149 | 0 | 0 | 0 | 0 | 1 | 0 | 0 | 0 | 2 | 0 | 1 |   |   |   |   |   |  |  |
| 151 | 150 | 0 | 0 | 0 | 0 | 1 | 0 | 0 | 0 | 2 | 0 | 1 |   |   |   |   |   |  |  |
| 152 | 151 | 0 | 0 | 0 | 0 | 1 | 0 | 0 | 0 | 2 | 0 | 1 |   |   |   |   |   |  |  |
| 153 | 152 | 0 | 1 | 0 | 0 | 1 | 0 | 0 | 0 | 2 | 0 | 1 |   |   |   |   |   |  |  |
| 154 | 153 | 0 | 1 | 1 | 1 | 0 | 0 | 0 | 0 | 2 | 0 | 1 |   |   |   |   |   |  |  |
| 155 | 154 | 0 | 1 | 1 | 1 | 1 | 0 | 0 | 0 | 1 | 0 | 1 |   |   |   |   |   |  |  |
| 156 | 155 | 0 | 0 | 0 | 0 | 1 | 1 | 1 | 0 | 1 | 0 | 1 |   |   |   |   |   |  |  |
| 157 | 156 | 0 | 0 | 0 | 0 | 1 | 0 | 0 | 0 | 2 | 0 | 1 |   |   |   |   |   |  |  |
| 158 | 157 | 0 | 1 | 0 | 0 | 0 | 0 | 0 | 0 | 1 | 0 | 1 |   |   |   |   |   |  |  |
| 159 | 158 | 0 | 0 | 0 | 0 | 0 | 0 | 0 | 0 | 2 | 0 | 1 |   |   |   |   |   |  |  |
| 160 | 159 | 0 | 1 | 1 | 1 | 1 | 0 | 0 | 0 | 1 | 0 | 1 |   |   |   |   |   |  |  |
| 161 | 160 | 0 | 1 | 1 | 1 | 1 | 0 | 0 | 0 | 2 | 0 | 1 |   |   |   |   |   |  |  |
| 162 | 161 | 0 | 0 | 1 | 0 | 0 | 0 | 0 | 0 | 2 | 0 | 1 |   |   |   |   |   |  |  |
| 163 | 162 | 0 | 0 | 0 | 0 | 1 | 0 | 0 | 0 | 2 | 0 | 1 |   |   |   |   |   |  |  |
| 164 | 163 | 0 | 0 | 0 | 0 | 1 | 1 | 1 | 2 | 1 | 0 | 1 |   |   |   |   |   |  |  |
| 165 | 164 | 0 | 1 | 0 | 0 | 0 | 1 | 1 | 2 | 0 | 0 | 1 | 0 | 0 | 1 | 0 |   |  |  |
| 166 | 165 | 0 | 0 | 0 | 0 | 0 | 1 | 1 | 2 | 0 | 0 | 1 | 0 | 0 | 0 | 0 |   |  |  |
| 167 | 166 | 1 | 1 | 1 | 1 | 0 | 1 | 1 | 2 | 1 | 0 | 1 |   |   |   |   |   |  |  |
| 168 | 167 | 0 | 1 | 0 | 0 | 1 | 0 | 1 | 2 | 1 | 0 | 1 |   |   |   |   |   |  |  |
| 169 | 168 | 0 | 0 | 0 | 0 | 1 | 1 | 1 | 2 | 1 | 0 | 1 |   |   |   |   |   |  |  |
| 170 | 169 | 0 | 0 | 0 | 0 | 1 | 1 | 1 | 2 | 1 | 0 | 1 |   |   |   |   |   |  |  |
| 171 | 170 | 0 | 0 | 0 | 0 | 1 | 0 | 1 | 2 | 1 | 0 | 1 |   |   |   |   |   |  |  |
| 172 | 171 | 0 | 0 | 1 | 0 | 1 | 1 | 1 | 2 | 1 | 0 | 1 |   |   |   |   |   |  |  |
| 173 | 172 | 0 |   |   |   | 0 | 1 | 1 | 2 | 1 | 0 | 1 |   |   |   |   |   |  |  |
| 174 | 173 | 0 | 0 | 0 | 0 | 0 | 1 | 1 | 2 | 1 | 0 | 1 |   |   |   |   |   |  |  |
| 175 | 174 | 0 | 1 | 0 | 0 | 1 | 0 | 1 | 2 | 1 | 0 | 1 |   |   |   |   |   |  |  |
| 176 | 175 | 0 | 0 | 0 | 0 | 1 | 1 | 1 | 2 | 0 | 0 | 1 | 0 | 0 | 0 | 0 |   |  |  |
| 177 | 176 | 0 | 1 | 0 | 0 | 1 | 1 | 0 | 2 | 0 | 0 | 1 | 0 | 0 | 1 | 0 |   |  |  |
| 178 | 177 | 0 | 0 | 0 | 0 | 1 | 0 | 1 | 2 | 1 | 0 | 1 |   |   |   |   |   |  |  |
| 179 | 178 | 0 | 1 | 0 | 0 | 0 | 1 | 1 | 2 | 0 | 0 | 1 | 0 | 0 | 1 | 0 |   |  |  |
| 180 | 179 | 0 | 0 | 0 | 0 | 0 | 1 | 1 | 2 | 1 | 0 | 1 |   |   |   |   |   |  |  |
| 181 | 180 | 0 | 0 | 0 | 0 | 0 | 1 | 1 | 2 | 0 | 0 | 1 | 0 | 0 | 0 | 0 |   |  |  |
| 182 | 181 | 0 |   |   |   | 0 | 0 | 1 | 2 | 1 | 0 | 1 |   |   |   |   |   |  |  |
| 183 | 182 | 0 | 0 | 1 | 1 | 0 | 1 | 1 | 2 | 0 | 0 | 1 | 0 | 0 | 0 | 0 |   |  |  |
| 184 | 183 | 0 | 0 | 0 | 0 | 0 | 1 | 1 | 2 | 0 | 0 | 1 | 0 | 0 | 0 | 0 |   |  |  |
| 185 | 184 | 0 | 0 | 0 | 0 | 0 | 1 | 1 | 2 | 0 | 0 | 1 | 0 | 0 | 0 | 0 |   |  |  |
| 186 | 185 | 1 | 1 | 0 | 0 | 1 | 1 | 1 | 2 | 1 | 0 | 1 |   |   |   |   |   |  |  |
| 187 | 186 | 0 | 0 | 0 | 0 | 1 | 1 | 1 | 2 | 1 | 0 | 1 |   |   |   |   |   |  |  |
| 188 | 187 | 0 | 0 | 1 | 1 | 0 | 1 | 1 | 2 | 1 | 0 | 1 |   |   |   |   |   |  |  |
| 189 | 188 | 1 | 1 | 1 | 1 | 0 | 1 | 1 | 2 | 1 | 0 | 1 |   |   |   |   |   |  |  |
| 190 | 189 | 0 | 0 | 0 | 0 | 1 | 0 | 0 | 2 | 0 | 0 | 1 | 0 | 0 | 0 | 0 |   |  |  |
| 191 | 190 | 0 | 0 | 0 | 0 | 1 | 0 | 1 | 2 | 1 | 0 | 1 |   |   |   |   |   |  |  |
| 192 | 191 | 0 | 0 | 1 | 0 | 0 | 0 | 1 | 2 | 0 | 0 | 1 | 0 | 0 | 0 | 1 |   |  |  |
| 193 | 192 | 0 | 0 | 0 | 0 | 0 | 1 | 1 | 2 | 1 | 0 | 1 |   |   |   |   |   |  |  |
| 194 | 193 | 1 | 1 | 1 | 1 | 0 | 1 | 1 | 2 | 1 | 0 | 1 |   |   |   |   |   |  |  |
| 195 | 194 | 0 | 0 | 0 | 0 | 0 | 0 | 1 | 2 | 0 | 0 | 1 | 0 | 0 | 0 | 0 |   |  |  |
| 196 | 195 | 0 | 0 | 0 | 0 | 1 | 0 | 1 | 2 | 1 | 0 | 1 |   |   |   |   |   |  |  |
| 197 | 196 | 0 | 0 | 0 | 0 | 0 | 0 | 1 | 2 | 1 | 0 | 1 |   |   |   |   |   |  |  |
| 198 | 197 | 0 | 0 | 0 | 0 | 0 | 0 | 1 | 2 | 0 | 0 | 1 | 0 | 0 | 0 | 0 |   |  |  |
| 199 | 198 | 0 |   |   |   | 0 | 0 | 1 | 2 | 0 | 0 | 1 | 0 | 0 |   |   |   |  |  |
| 200 | 199 | 0 | 0 | 0 | 0 | 1 | 1 | 1 | 2 | 1 | 0 | 1 |   |   |   |   |   |  |  |
| 201 | 200 | 0 | 0 | 0 | 0 | 0 | 0 | 1 | 2 | 0 | 0 | 1 | 0 | 0 | 0 | 0 |   |  |  |
| 202 | 201 | 0 | 0 | 0 | 0 | 1 | 0 | 1 | 2 | 0 | 0 | 1 | 0 | 0 | 0 | 0 |   |  |  |
| 203 | 202 | 1 | 0 | 0 | 1 | 1 | 1 | 1 | 2 | 1 | 0 | 1 |   |   |   |   |   |  |  |
| 204 | 203 | 0 |   |   |   | 0 | 0 | 0 | 2 | 1 | 0 | 1 |   |   |   |   |   |  |  |
| 205 | 204 | 0 | 0 | 0 | 0 | 0 | 0 | 1 | 2 | 1 | 0 | 1 |   |   |   |   |   |  |  |
| 206 | 205 | 0 | 0 | 0 | 0 | 0 | 0 | 1 | 2 | 0 | 0 | 1 | 0 | 0 | 0 | 0 |   |  |  |
| 207 | 206 | 0 | 0 | 0 | 0 | 1 | 0 | 1 | 2 | 0 | 0 | 1 | 0 | 0 | 0 | 0 |   |  |  |
| 208 | 207 | 0 | 0 | 0 | 0 | 0 | 1 | 1 | 2 | 1 | 0 | 1 |   |   |   |   |   |  |  |
| 209 | 208 | 0 | 0 | 0 | 0 | 0 | 0 | 1 | 2 | 1 | 0 | 1 |   |   |   |   |   |  |  |
| 210 | 209 | 0 | 0 | 0 | 0 | 1 | 0 | 1 | 2 | 1 | 0 | 1 |   |   |   |   |   |  |  |
| 211 | 210 | 0 |   |   |   | 0 | 0 | 1 | 2 | 1 | 0 | 1 |   |   |   |   |   |  |  |
| 212 | 211 | 0 | 0 | 0 | 0 | 0 | 1 | 1 | 2 | 1 | 0 | 1 |   |   |   |   |   |  |  |
| 213 | 212 | 0 | 0 | 0 | 0 | 0 | 1 | 1 | 2 | 0 | 0 | 1 | 0 | 0 | 0 | 0 |   |  |  |
| 214 | 213 | 0 | 0 | 0 | 0 | 0 | 1 | 1 | 2 | 0 | 0 | 1 | 0 | 0 | 0 | 0 |   |  |  |
| 215 | 214 | 0 |   |   |   | 0 | 0 | 1 | 2 | 1 | 0 | 1 |   |   |   |   |   |  |  |
| 216 | 215 | 0 | 0 | 0 | 0 | 0 | 1 | 1 | 2 | 0 | 0 | 1 | 0 | 0 | 0 | 0 |   |  |  |
| 217 | 216 | 0 |   |   |   | 1 | 0 | 1 |   |   |   |   |   |   |   |   |   |  |  |

|     |     |   |   |   |   |   |   |   |   |   |   |   |   |   |   |   |   |   |  |
|-----|-----|---|---|---|---|---|---|---|---|---|---|---|---|---|---|---|---|---|--|
| 229 | 228 | 0 |   |   | 0 | 0 | 1 | 1 | 2 | 0 | 0 | 1 |   | 0 |   |   |   |   |  |
| 230 | 229 | 0 |   |   | 0 | 0 | 1 | 1 | 2 | 1 | 0 |   | 1 |   |   |   |   |   |  |
| 231 | 230 | 0 | 0 | 0 | 0 | 0 | 0 | 1 | 2 | 1 | 0 |   | 1 |   |   |   |   |   |  |
| 232 | 231 | 0 | 1 | 0 | 0 | 1 | 0 | 0 | 2 | 0 | 0 | 1 |   |   | 0 | 1 |   | 0 |  |
| 233 | 232 | 0 | 0 | 0 | 0 | 0 | 1 | 0 | 2 | 0 | 0 | 1 |   | 0 | 0 |   |   | 0 |  |
| 234 | 233 | 0 |   |   | 0 | 1 | 1 | 1 | 2 | 1 | 0 |   | 1 |   |   |   |   |   |  |
| 235 | 234 | 0 | 0 | 0 | 0 | 1 | 0 | 1 | 2 | 1 | 0 |   | 1 |   |   |   |   |   |  |
| 236 | 235 | 0 | 0 | 0 | 0 | 1 | 1 | 1 | 2 | 2 | 0 |   | 1 |   |   |   |   |   |  |
| 237 | 236 | 0 | 0 | 0 | 0 | 1 | 0 | 0 | 2 | 0 | 0 |   | 1 |   |   |   |   |   |  |
| 238 | 237 | 0 | 0 | 0 | 0 | 1 | 0 | 0 | 2 | 0 | 0 |   | 1 |   |   |   |   |   |  |
| 239 | 238 | 0 |   |   | 0 | 0 | 1 | 1 | 0 | 0 | 0 |   | 1 |   |   |   |   |   |  |
| 240 | 239 | 0 | 0 | 1 | 0 | 1 | 0 | 0 | 0 | 1 | 0 |   | 1 |   |   |   |   |   |  |
| 241 | 240 | 0 | 1 | 1 | 0 | 1 | 0 | 0 | 0 | 2 | 0 |   | 1 |   |   |   |   |   |  |
| 242 | 241 | 0 | 0 | 0 | 0 | 0 | 1 | 0 | 0 | 1 | 0 |   | 1 |   |   |   |   |   |  |
| 243 | 242 | 0 | 0 | 0 | 0 | 1 | 0 | 0 | 0 | 2 | 0 |   | 1 |   |   |   |   |   |  |
| 244 | 243 | 0 |   |   | 0 | 0 | 0 | 0 | 0 | 0 | 0 |   | 1 |   | 0 |   |   |   |  |
| 245 | 244 | 0 |   |   | 0 | 1 | 0 | 0 | 0 | 1 | 0 |   | 1 |   |   |   |   |   |  |
| 246 | 245 | 0 | 0 | 0 | 0 | 1 | 0 | 0 | 0 | 0 | 0 |   | 1 |   | 0 | 0 |   | 0 |  |
| 247 | 246 | 0 | 1 | 0 | 0 | 1 | 0 | 0 | 0 | 1 | 0 |   | 1 |   |   |   |   |   |  |
| 248 | 247 | 0 | 1 | 1 | 0 | 1 | 0 | 0 | 0 | 2 | 0 |   | 1 |   |   |   |   |   |  |
| 249 | 248 | 0 |   | 0 | 0 | 0 | 1 | 0 | 0 | 2 | 0 |   | 1 |   |   |   |   |   |  |
| 250 | 249 | 1 |   |   |   | 1 | 1 | 0 | 0 | 2 | 0 |   | 1 |   |   |   |   |   |  |
| 251 | 250 | 0 |   |   | 0 | 1 | 0 | 1 | 0 | 1 | 0 |   | 1 |   |   |   |   |   |  |
| 252 | 251 | 0 |   |   | 0 | 1 | 0 | 0 | 0 | 1 | 0 |   | 1 |   |   |   |   |   |  |
| 253 | 252 | 0 | 1 | 0 | 1 | 1 | 0 | 1 | 0 | 1 | 0 |   | 1 |   |   |   |   |   |  |
| 254 | 253 | 0 | 0 | 0 | 0 | 1 | 0 | 0 | 0 | 1 | 0 |   | 1 |   |   |   |   |   |  |
| 255 | 254 | 0 | 1 | 0 | 0 | 1 | 0 | 0 | 0 | 1 | 0 |   | 1 |   |   |   |   |   |  |
| 256 | 255 | 0 | 1 | 0 | 0 | 1 | 0 | 0 | 0 | 1 | 0 |   | 1 |   |   |   |   |   |  |
| 257 | 256 | 1 |   | 1 | 0 | 0 | 0 | 0 | 0 | 1 | 0 |   | 1 |   |   |   |   |   |  |
| 258 | 257 | 0 | 1 | 0 | 0 | 1 | 0 | 0 | 0 | 1 | 0 |   | 1 |   |   |   |   |   |  |
| 259 | 258 | 0 | 1 | 0 | 0 | 1 | 0 | 0 | 0 | 1 | 0 |   | 1 |   |   |   |   |   |  |
| 260 | 259 | 0 | 0 | 0 | 0 | 1 | 0 | 1 | 0 | 0 | 0 |   | 1 |   | 0 | 0 |   | 0 |  |
| 261 | 260 | 0 | 0 | 0 | 0 | 1 | 0 | 0 | 0 | 1 | 0 |   | 1 |   |   |   |   |   |  |
| 262 | 261 | 0 | 1 | 0 | 0 | 0 | 0 | 0 | 0 | 1 | 0 |   | 1 |   |   |   |   |   |  |
| 263 | 262 | 0 | 0 | 0 | 0 | 1 | 0 | 0 | 0 | 1 | 0 |   | 1 |   |   |   |   |   |  |
| 264 | 263 | 0 | 1 |   |   | 0 | 0 | 0 | 0 | 0 | 0 |   | 1 |   | 0 |   | 1 |   |  |
| 265 | 264 | 0 | 0 | 0 | 0 | 1 | 0 | 1 | 0 | 1 | 0 |   | 1 |   |   |   |   |   |  |
| 266 | 265 | 0 | 0 | 0 | 0 | 0 | 0 | 0 | 0 | 1 | 0 |   | 1 |   |   |   |   |   |  |
| 267 | 266 | 1 | 1 | 1 | 0 | 1 | 0 | 0 | 0 | 1 | 0 |   | 1 |   |   |   |   |   |  |
| 268 | 267 | 0 |   |   |   | 1 | 0 | 0 | 0 | 1 | 0 |   | 1 |   |   |   |   |   |  |
| 269 | 268 | 0 | 0 | 0 | 0 | 1 | 0 | 1 | 0 | 1 | 0 |   | 1 |   |   |   |   |   |  |
| 270 | 269 | 0 | 0 | 0 | 0 | 1 | 1 | 0 | 0 | 1 | 0 |   | 1 |   |   |   |   |   |  |
| 271 | 270 | 1 | 1 | 1 | 1 | 1 | 0 | 0 | 0 | 1 | 0 |   | 1 |   |   |   |   |   |  |
| 272 | 271 | 0 | 1 | 1 | 1 | 1 | 0 | 0 | 0 | 1 | 0 |   | 1 |   |   |   |   |   |  |
| 273 | 272 | 0 | 0 | 0 | 0 | 1 | 0 | 1 | 0 | 1 | 0 |   | 1 |   |   |   |   |   |  |
| 274 | 273 | 0 | 0 | 0 | 0 | 1 | 0 | 0 | 0 | 1 | 0 |   | 1 |   |   |   |   |   |  |
| 275 | 274 | 0 | 0 | 0 | 0 | 1 | 0 | 0 | 0 | 1 | 0 |   | 1 |   |   |   |   |   |  |
| 276 | 275 | 1 | 1 | 1 | 1 | 0 | 0 | 0 | 0 | 1 | 0 |   | 1 |   |   |   |   |   |  |
| 277 | 276 | 1 | 1 | 1 | 0 | 1 | 0 | 0 | 0 | 1 | 0 |   | 1 |   |   |   |   |   |  |
| 278 | 277 | 0 | 1 | 1 | 0 | 1 | 0 | 0 | 0 | 1 | 0 |   | 1 |   |   |   |   |   |  |
| 279 | 278 | 0 | 1 | 0 | 0 | 1 | 0 | 0 | 0 | 1 | 0 |   | 1 |   |   |   |   |   |  |
| 280 | 279 | 0 | 1 | 0 | 0 | 1 | 1 | 0 | 0 | 1 | 0 |   | 1 |   |   |   |   |   |  |
| 281 | 280 | 0 | 0 | 0 | 0 | 1 | 0 | 1 | 0 | 1 | 0 |   | 1 |   |   |   |   |   |  |
| 282 | 281 | 0 | 0 | 0 | 0 | 1 | 0 | 0 | 0 | 1 | 0 |   | 1 |   |   |   |   |   |  |
| 283 | 282 | 1 | 1 | 1 | 0 | 0 | 0 | 1 | 0 | 1 | 0 |   | 1 |   |   |   |   |   |  |
| 284 | 283 | 0 | 1 | 1 | 0 | 0 | 0 | 1 | 0 | 1 | 0 |   | 1 |   |   |   |   |   |  |
| 285 | 284 | 0 | 1 | 0 | 0 | 0 | 0 | 1 | 0 | 1 | 0 |   | 1 |   |   |   |   |   |  |
| 286 | 285 | 1 | 1 | 1 | 1 | 1 | 0 | 0 | 0 | 1 | 0 |   | 1 |   |   |   |   |   |  |
| 287 | 286 | 0 | 0 | 0 | 0 | 0 | 0 | 1 | 0 | 1 | 0 |   | 1 |   |   |   |   |   |  |
| 288 | 287 | 0 |   |   |   | 0 | 1 | 0 | 0 | 1 | 0 |   | 1 |   |   |   |   |   |  |
| 289 | 288 | 0 |   |   |   | 0 | 1 | 0 | 0 | 1 | 0 |   | 1 |   |   |   |   |   |  |
| 290 | 289 | 0 | 0 | 0 | 0 | 0 | 1 | 0 | 0 | 0 | 0 |   | 1 |   | 0 | 0 |   |   |  |
| 291 | 290 | 0 | 0 | 0 | 0 | 1 | 0 | 1 | 0 | 1 | 0 |   | 1 |   |   |   |   |   |  |
| 292 | 291 | 0 | 1 | 0 | 0 | 0 | 1 | 1 | 0 | 1 | 0 |   | 1 |   |   |   |   |   |  |
| 293 | 292 | 0 |   |   |   | 0 | 1 | 1 | 0 | 0 | 1 |   | 1 |   |   |   |   |   |  |
| 294 | 293 | 0 | 0 | 0 | 0 | 0 | 0 | 0 | 0 | 1 | 0 |   | 1 |   |   |   |   |   |  |
| 295 | 294 | 0 | 0 | 0 | 0 | 1 | 0 | 0 | 0 | 1 | 0 |   | 1 |   |   |   |   |   |  |
| 296 | 295 | 1 |   |   |   | 0 | 1 | 0 | 0 | 0 | 1 |   | 1 |   |   |   |   |   |  |
| 297 | 296 | 0 | 1 | 0 | 1 | 1 | 0 | 1 | 0 | 1 | 0 |   | 1 |   |   |   |   |   |  |
| 298 | 297 | 0 | 0 | 0 | 0 | 0 | 1 | 1 | 0 | 0 | 0 |   | 1 |   | 0 | 0 |   | 0 |  |
| 299 | 298 | 0 |   |   |   | 0 | 0 | 1 | 0 | 0 | 0 |   | 1 |   |   |   |   |   |  |
| 300 | 299 | 0 | 1 | 0 | 0 | 1 | 0 | 0 | 0 | 0 | 0 |   | 1 |   | 0 | 1 |   | 0 |  |
| 301 | 300 | 0 | 0 | 0 | 0 | 1 | 0 | 1 | 2 | 0 | 0 |   | 1 |   | 0 | 0 |   | 0 |  |
| 302 | 301 | 0 | 0 | 0 | 0 | 0 | 0 | 0 | 0 | 0 | 0 |   | 1 |   | 0 | 0 |   | 0 |  |
| 303 | 302 | 0 | 0 | 0 | 0 | 1 | 0 | 0 | 0 | 1 | 0 |   | 1 |   |   |   |   |   |  |
| 304 | 303 | 0 | 0 | 0 | 0 | 1 | 0 | 1 | 0 | 0 | 0 |   | 1 |   | 0 | 0 |   | 0 |  |
| 305 | 304 | 0 | 0 | 0 | 0 | 1 | 0 | 0 | 0 | 0 | 0 |   | 1 |   | 0 | 0 |   | 0 |  |
| 306 | 305 | 0 | 0 | 0 | 0 | 1 | 0 | 0 | 0 | 0 | 0 |   | 1 |   | 0 | 0 |   | 0 |  |
| 307 | 306 | 0 | 0 | 0 | 0 | 1 | 1 | 0 | 0 | 0 | 0 |   | 1 |   | 0 | 0 |   | 0 |  |
| 308 | 307 | 0 | 0 | 0 | 0 | 0 | 0 | 0 | 0 | 0 | 0 |   | 1 |   | 0 | 0 |   | 0 |  |
| 309 | 308 | 0 | 0 | 0 | 0 | 0 | 0 | 0 | 0 | 0 | 0 |   | 1 |   | 0 | 0 |   | 0 |  |
| 310 | 309 | 0 | 0 | 0 | 0 | 1 | 0 | 0 | 0 | 0 | 0 |   | 1 |   | 0 | 0 |   | 0 |  |
| 311 | 310 | 0 | 0 | 0 | 0 | 0 | 0 | 1 | 0 | 0 | 0 |   | 1 |   | 0 | 0 |   | 0 |  |
| 312 | 311 | 0 | 0 | 0 | 0 | 1 | 0 | 0 | 0 | 0 | 0 |   | 1 |   | 0 | 0 |   | 0 |  |
| 313 | 312 | 0 | 1 | 0 | 0 | 1 | 0 | 0 | 0 | 0 | 0 |   | 1 |   | 0 | 1 |   | 0 |  |
| 314 | 313 | 0 | 0 | 0 | 0 | 1 | 0 | 0 | 0 | 0 | 0 |   | 1 |   | 0 | 0 |   | 0 |  |
| 315 | 314 | 0 | 0 | 0 | 0 | 1 | 0 | 1 | 0 | 0 | 0 |   | 1 |   | 0 | 0 |   | 0 |  |
| 316 | 315 | 0 | 0 | 0 | 0 | 0 | 0 | 0 | 0 | 0 | 0 |   | 1 |   | 0 | 0 |   | 0 |  |
| 317 | 316 | 0 | 0 | 0 | 0 | 1 | 1 | 0 | 0 | 0 | 0 |   | 1 |   | 0 | 0 |   | 0 |  |
| 318 | 317 | 0 | 0 | 0 | 0 | 0 | 1 | 0 | 0 | 0 | 0 |   | 1 |   | 0 | 0 |   | 0 |  |
| 319 | 318 | 0 | 0 | 0 | 0 | 0 | 0 | 1 | 0 | 0 | 0 |   | 1 |   | 0 | 0 |   | 0 |  |
| 320 | 319 | 0 | 0 | 0 | 0 | 1 | 0 | 0 | 0 | 0 | 0 |   | 1 |   | 0 | 0 |   | 0 |  |
| 321 | 320 | 0 |   |   |   | 0 | 0 | 0 | 0 | 0 | 0 |   | 1 |   | 0 | 0 |   | 0 |  |
| 322 | 321 | 0 | 0 | 0 | 0 | 0 | 1 | 0 | 0 | 0 | 0 |   | 1 |   | 0 | 0 |   | 0 |  |
| 323 | 322 | 0 | 0 | 0 | 0 | 1 | 0 | 0 | 0 | 0 | 0 |   | 1 |   | 0 | 0 |   | 0 |  |
| 324 | 323 | 0 | 0 | 0 | 0 | 1 | 0 | 0 | 0 | 1 | 0 |   | 1 |   |   |   |   |   |  |
| 325 | 324 | 0 | 0 | 0 | 0 | 1 | 0 | 0 | 0 | 1 | 0 |   | 1 |   |   |   |   |   |  |
| 326 | 325 | 0 | 0 | 0 | 0 | 0 | 0 | 0 | 0 | 0 | 0 |   | 1 |   | 0 | 0 |   | 0 |  |
| 327 | 326 | 0 | 1 | 0 | 0 | 1 | 0 | 1 | 0 | 0 | 0 |   | 1 |   | 0 | 1 |   | 0 |  |
| 328 | 327 | 0 |   |   |   | 0 | 0 | 0 | 2 | 0 | 0 |   | 1 |   | 0 | 0 |   | 0 |  |
| 329 | 328 | 0 | 1 | 0 | 0 | 0 | 0 | 0 | 0 | 0 | 0 |   | 1 |   | 0 | 1 |   | 0 |  |
| 330 | 329 | 0 | 0 | 0 | 0 | 0 | 0 | 0 | 0 | 0 | 0 |   | 1 |   | 0 | 0 |   | 0 |  |
| 331 | 330 | 0 | 0 | 0 | 0 | 1 | 0 | 0 | 0 | 0 | 0 |   | 1 |   | 0 | 0 |   | 0 |  |
| 332 | 331 | 0 | 0 | 0 | 0 | 1 | 0 | 1 | 0 | 0 | 0 |   | 1 |   | 0 | 0 |   | 0 |  |
| 333 | 332 | 0 | 0 | 0 | 0 | 0 | 0 | 0 | 0 | 0 | 0 |   | 1 |   | 0 | 0 |   | 0 |  |
| 334 | 333 | 0 | 1 | 1 | 1 | 0 | 0 | 0 | 0 | 0 | 0 |   | 1 |   | 0 | 1 |   | 1 |  |
| 335 | 334 |   |   |   |   |   |   |   |   |   |   |   |   |   |   |   |   |   |  |
